# Supplementary material for: Paneth Cell Ablation Aggravates Pancreatic and Intestinal Injuries in a Rat Model of Acute Necrotizing Pancreatitis after Normal and High-Fat Diet
Source: Hindawi journal article supplement (doi:10.1155/2019/8474523), 2019-11-11
Supplement: f1 [file 8474523.f1.pdf]

| Pancreatic histologic scoring criteria (3 slides/animal) |                                                   |                                                   |                                                         |            |
|----------------------------------------------------------|---------------------------------------------------|---------------------------------------------------|---------------------------------------------------------|------------|
| Scores                                                   | Edema                                             | Inflammation and Infiltration                     | Acinar Necrosis                                         | Hemorrhage |
| 0                                                        | Absent                                            | 0-1 Intralobular or perivascular leukocytes/HPF   | Absent                                                  | Absent     |
| 0.5                                                      | Focal expansion of interlobar septae              | 2-5 Intralobular or perivascular leukocytes/HPF   | Focal occurrence of 1-4 necrotic cells/HPF              | 1 focus    |
| 1                                                        | Diffuse expansion of interlobar septae            | 6-10 Intralobular or perivascular leukocytes/HPF  | Diffuse occurrence of 1-4 necrotic cells/HPF            | 2 foci     |
| 1.5                                                      | Same as 1+ focal expansion of interlobar septae   | 11-15 Intralobular or perivascular leukocytes/HPF | Same as 1+ focal occurrence of 5-10 necrotic cells/HPF  | 3 foci     |
| 2                                                        | Same as 1+ diffuse expansion of interlobar septae | 16-20 Intralobular or perivascular leukocytes/HPF | Diffuse occurrence of 5-10 necrotic cells/HPF           | 4 foci     |
| 2.5                                                      | Same as 2+ focal expansion of interlobar septae   | 21-25 Intralobular or perivascular leukocytes/HPF | Same as 2+ focal occurrence of 11-16 necrotic cells/HPF | 5 foci     |
| 3                                                        | Same as 2+ diffuse expansion of interlobar septae | 26-30 Intralobular or perivascular leukocytes/HPF | Diffuse occurrence of 11-16 necrotic cells/HPF          | 6 foci     |
| 3.5                                                      | Same as 3+ focal expansion of interlobar septae   | >30 leukocytes/HPF or focal microabscesses        | Same as 3+ focal occurrence of >16 necrotic cells/HPF   | 7 foci     |
| 4                                                        | Same as 3+ diffuse expansion of interlobar septae | >35 leukocytes/HPF or confluent microabscesses    | >16 necrotic cells/HPF                                  | 8+ foci    |

1

2 Supplementary Table 1: Pancreatic lesion index (scoring criteria)

| Ileal histologic scoring criteria (3 slides/animal) |                                                                                                                               |                                                                |                                            |
|-----------------------------------------------------|-------------------------------------------------------------------------------------------------------------------------------|----------------------------------------------------------------|--------------------------------------------|
| Scores                                              | Mucosal damage                                                                                                                | Inflammation                                                   | Congestion/Hemorrhage                      |
| 0                                                   | Absent                                                                                                                        | Absent                                                         | Absent                                     |
| 1                                                   | Increase of spaces under intestinal mucosal epithelium, with capillary congestion and villi swelling                          | Focal occurrence of inflammatory cells in the lamina propria   | Capillary congestion in the lamina propria |
| 2                                                   | Expansion of spaces under intestinal mucosal epithelium, with moderate separation between epithelial layer and lamina propria | Diffuse occurrence of inflammatory cells in the lamina propria | Focal hemorrhage in the lamina propria     |
| 3                                                   | Extensive expansion of spaces under intestinal mucosal epithelium, with broken villi top                                      | Focal occurrence of inflammatory cells under the endothelium   | Diffuse hemorrhage in the lamina propria   |
| 4                                                   | Villus breakage and shedding of lamina propria, with exposure of lamina propria capillaries                                   | Diffuse occurrence of inflammatory cells under the endothelium | Subendothelial hemorrhage                  |
| 5                                                   | Degeneration of the lamina propria, accompanied by bleeding and ulceration                                                    | Extensive accumulation of Inflammatory cells                   | Extensive hemorrhage                       |

3

4 Supplementary Table 2: Ileal lesion index (scoring criteria)

5



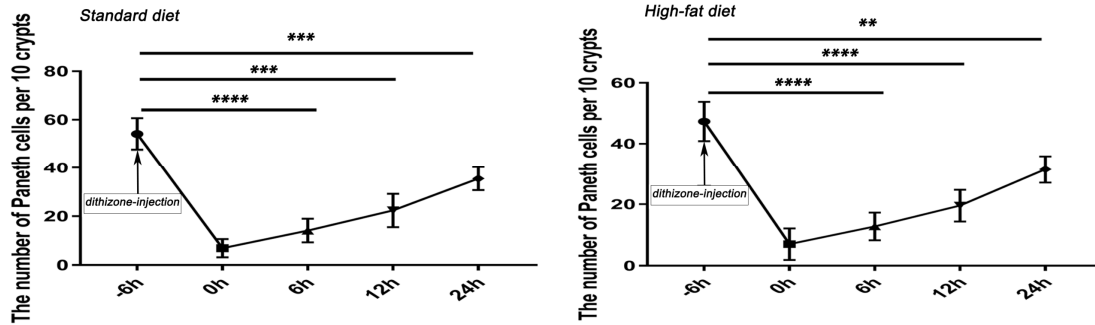

**Supplementary Figure 1: Dithizone depletes Paneth cells in rats.** Quantification of Paneth cells after dithizone injection in rats on a standard or high-fat diet. \* $p < 0.05$ , \*\* $p < 0.01$ , \*\*\* $p < 0.001$ , \*\*\*\* $p < 0.0001$ , one-way ANOVA test. Results were expressed as the mean  $\pm$  SD (n=8).

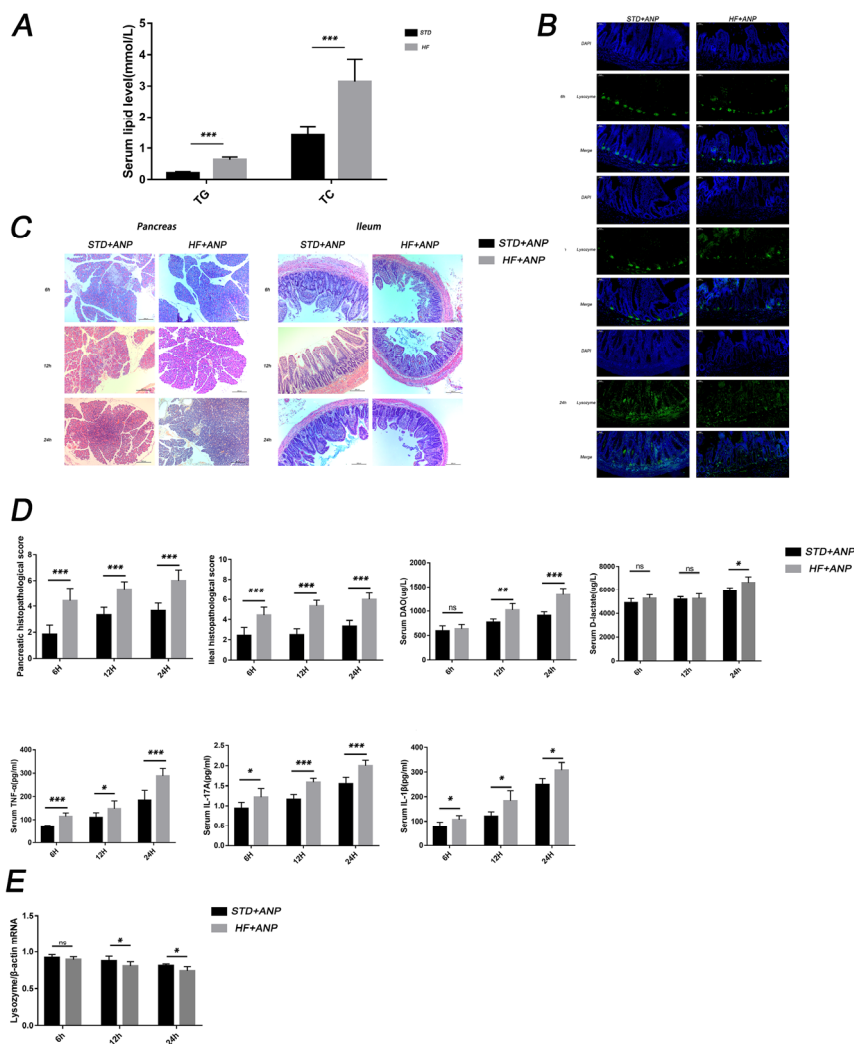

11 **Supplementary Figure 2: Effect of high-fat diet on ANP-associated injuries caused by**  
12 **retrograde sodium taurocholate infusion.** (A) Serum TG and TC levels in rats fed a high-fat or  
13 standard diet. (B) Lysozyme protein expression (green) in Paneth cells of the distal ileum as  
14 assessed by immunofluorescence. Nuclei were counterstained with DAPI (magnification ×200). (C)  
15 Pancreas and distal ileum sections of rats fed high-fat or standard diet stained with H&E  
16 (magnification ×100). (D) Histopathological scores of pancreas and distal ileum, serum levels of  
17 inflammatory cytokines, diamine oxidase (DAO) activity and serum D-lactate in rats fed a high-fat  
18 or standard diet. (E) Lysozyme mRNA expression as assessed by RT-PCR. \*p<0.05, \*\*p<0.01,  
19 \*\*\*p<0.001, Student's t-test. Results were expressed as the mean ± SD (n=5).

20

21

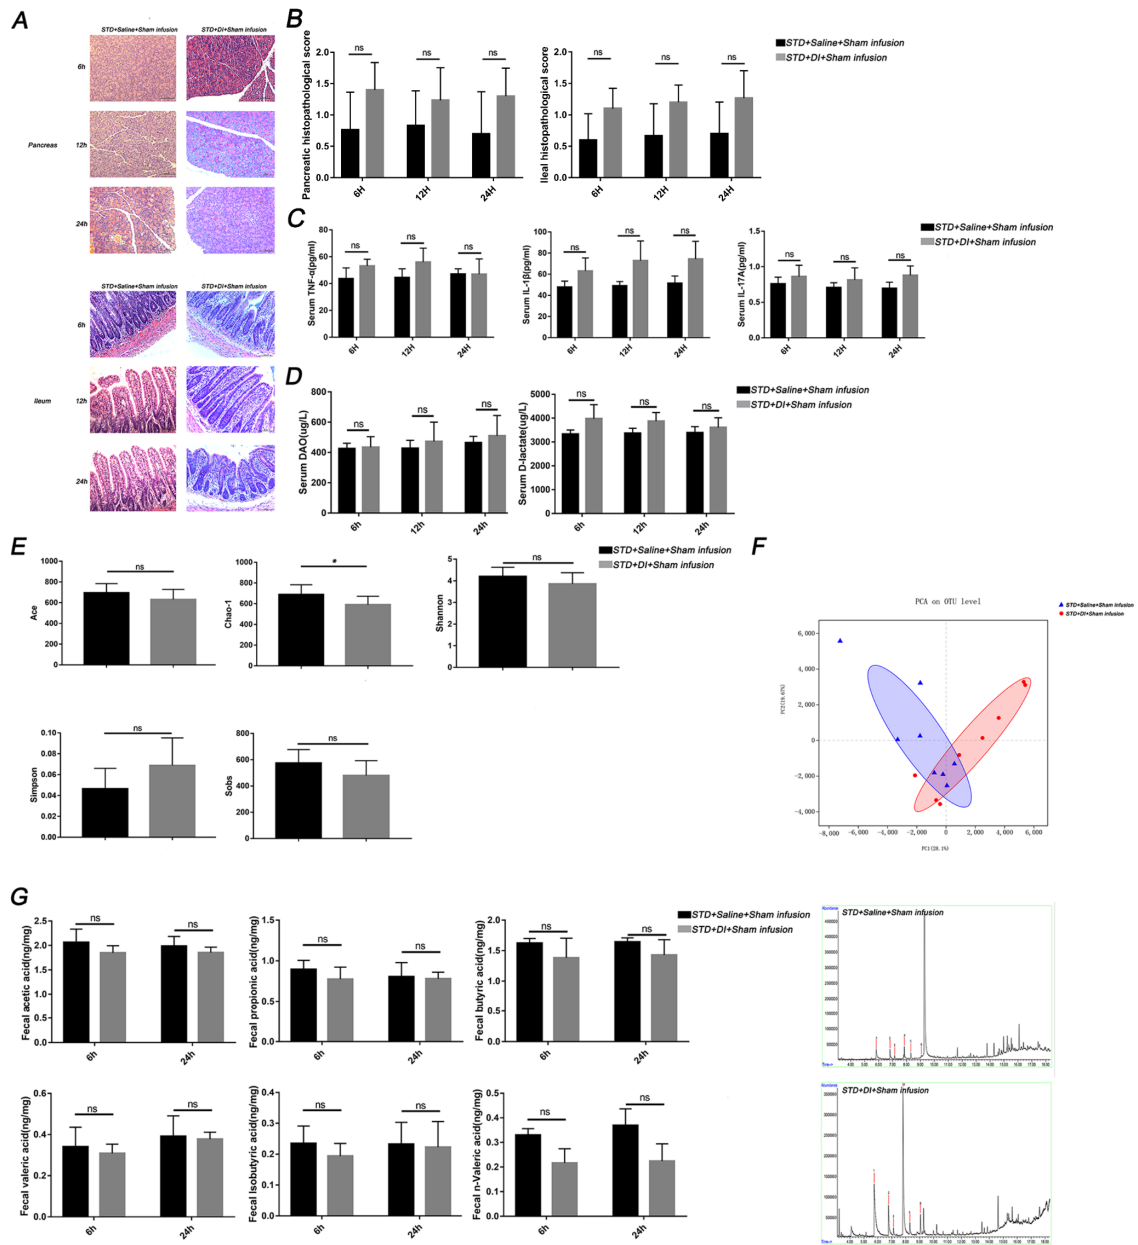

22

23 **Supplementary Figure 3: Effects of dithizone in rats on standard diet followed by sham**  
 24 **biliopancreatic infusion.** (A) Sections of pancreas and the distal ileum stained with H&E in rats  
 25 treated with dithizone or saline (magnification  $\times 200$ ). (B) Histopathological scores of the pancreas  
 26 and the distal ileum. (C) Serum inflammatory cytokines in rats treated with dithizone or saline. (D)  
 27 DAO activity and serum D-lactate in rats treated with dithizone or saline. (E) Estimators of intestinal

28 microbiota  $\alpha$ -diversity in rats treated with dithizone or saline. (F) PCA of microbiota  $\beta$ -diversity in  
 29 rats treated with dithizone or saline. (G) Fecal SCFA levels in rats treated with dithizone or saline.  
 30 \* $p < 0.05$ , Student's t-test. Results were expressed as the mean  $\pm$  SD (n=5).

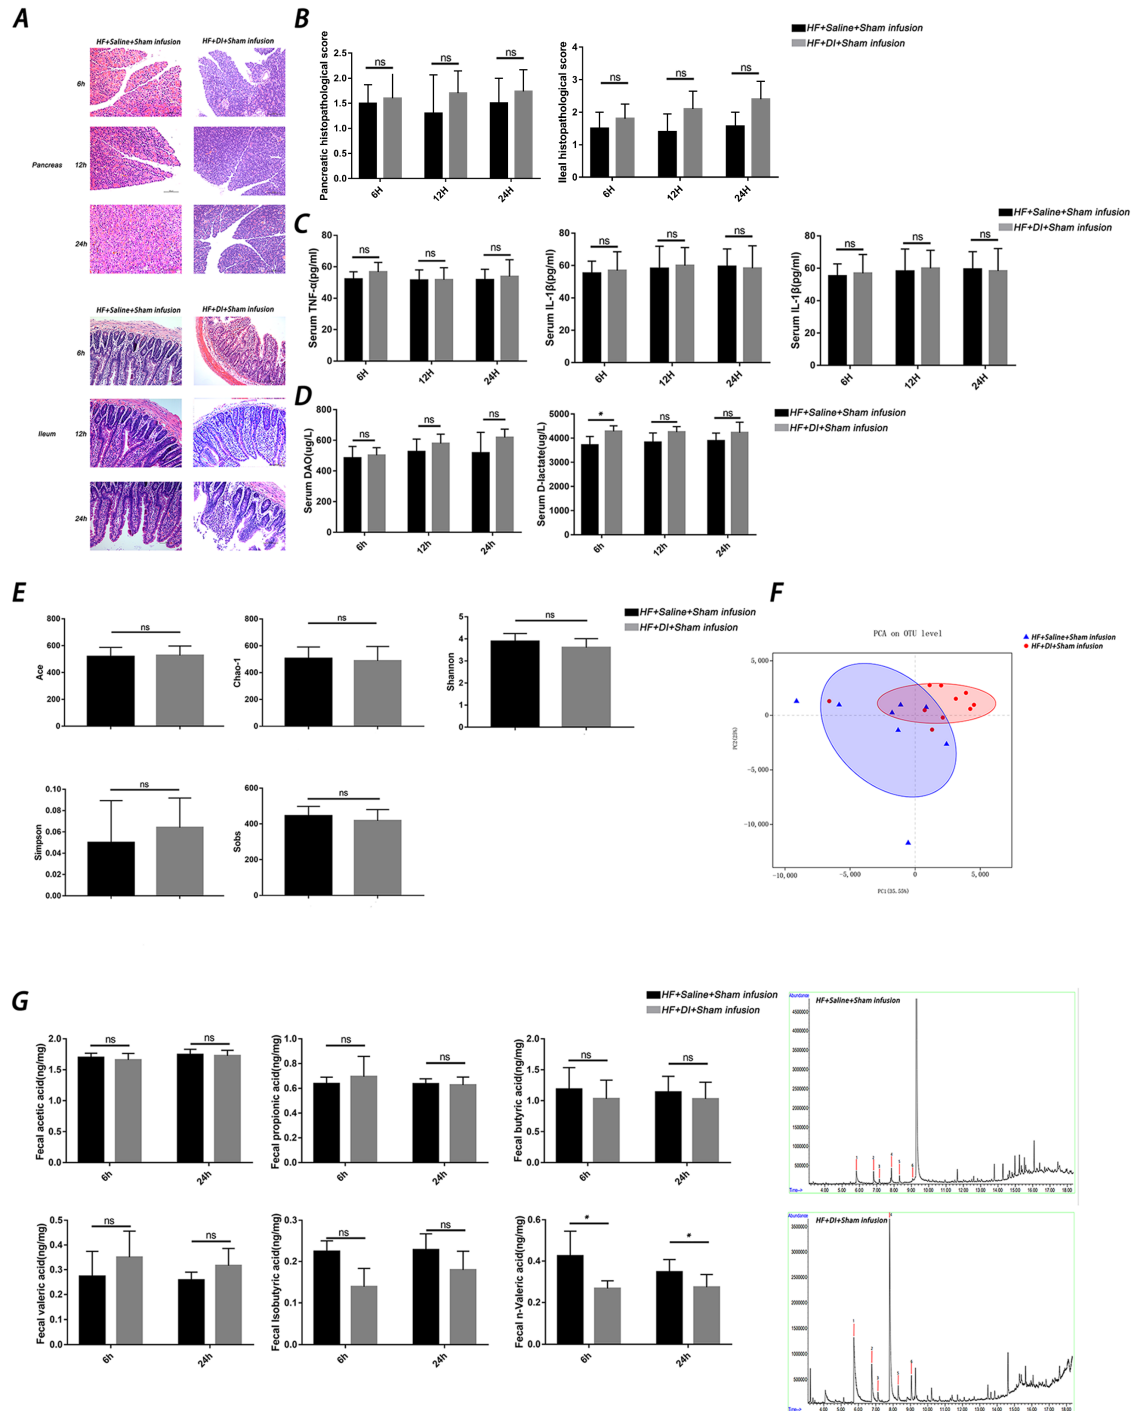

32 **Supplementary Figure 4: Effects of dithizone in rats on high-fat diet followed by sham**  
 33 **biliopancreatic infusion.** (A) Sections of pancreas and distal ileum stained with H&E in rats  
 34 treated with dithizone or saline (magnification  $\times 200$ ). (B) Histopathological scores of the pancreas  
 35 and the distal ileum. (C) Serum inflammatory cytokines in rats treated with dithizone or saline. (D)  
 36 DAO activity and serum D-lactate in rats treated with dithizone or saline. (E) Estimators of intestinal  
 37 microbiota  $\alpha$ -diversity in rats treated with dithizone or saline. (F) PCA of microbial  $\beta$ -diversity in rats  
 38 treated with dithizone or saline. (G) Fecal SCFA levels in rats treated with dithizone or saline.  
 39  $*p < 0.05$ , Student's t-test. Results were expressed as the mean  $\pm$  SD (n=5).

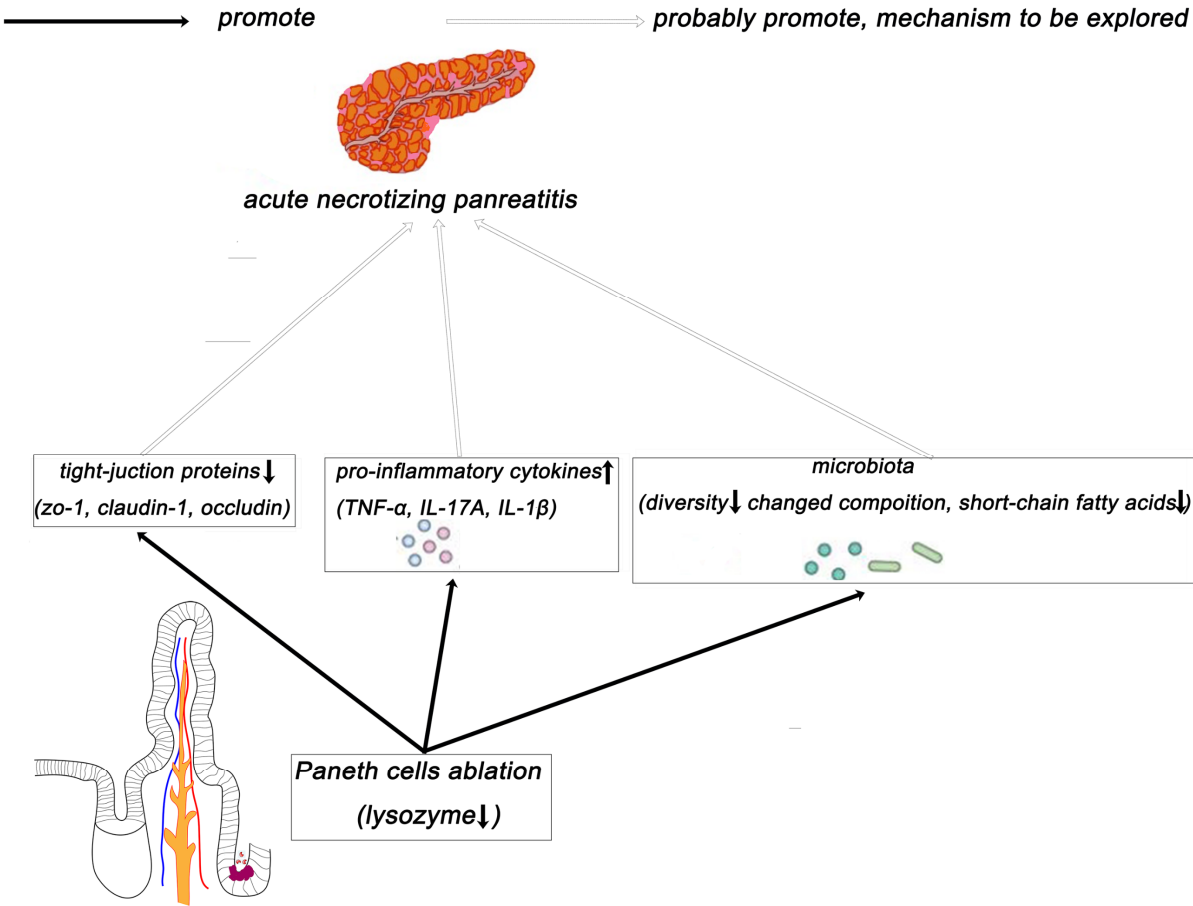

40  
 41 **Supplementary Figure 5: Mechanism of Paneth cells in pancreatic and intestinal injuries.**

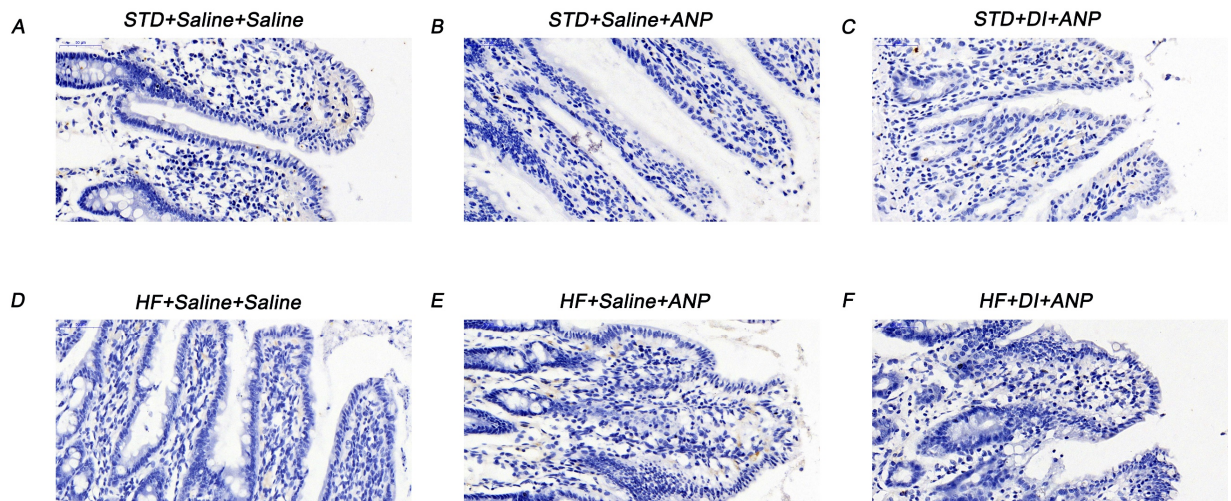

**Supplementary Figure 6: Images of the control reaction (tissue sections where the primary antibody was omitted during the immunohistochemistry reaction).** (A) Group STD + Saline + Saline. (B) Group STD + Saline + ANP. (C) Group STD + DI + ANP. (D) Group HF + Saline + Saline. (E) Group HF + Saline + ANP. (F) Group HF + DI + ANP.
